# Supplementary material for: Survival benefit from adjuvant chemoradiotherapy in local advanced gastric cancer without accurate D2 confirmation: a real-world retrospective study (TJ-ARK01)
Source: PeerJ. 2025 Jul 10;13:e19363. doi: 10.7717/peerj.19363 (PMC12256042; doi:10.7717/peerj.19363)
Supplement: Supplemental Information 2 [file peerj-13-19363-s002.xlsx]

## Sheet: spss data
	1=ct group，2=crt group									1=male，2=female	1=yes，0=no	1=yes，0=no	1=poor，2=medium+well	1=BI，2=BII，3=Roux-en-Y	3=IIA，4=IIB，5=IIIA，6=IIIB，7=IIIC	0=N0，1=N1，2=N2，3=N3				0=her 0，1=her1+，2=her2+，3=her3+
Serial Number	group	surgery date	OS date	DFSdate	OS months	OS status	DFS months	DFS status	age	gender	smoking history	drinking history	tumor differentiation	surgery	TNM stage	N stage	positiveLN number	dissectedLN number	positive LN ratio	HER2 expression
1	1	2013-04-05	2022-03-01	2022-03-01	106	0	106	0	66	1	1	0	1	2	4	1	1	23	0.04	0
2	1	2013-04-17	2022-03-01	2022-03-01	106	0	106	0	49	1	0	0	1	3	4	2	2	12	0.17	2
3	1	2013-11-18	2022-03-01	2022-03-01	99	0	99	0	53	1	0	1	2	2	4	1	2	53	0.04	0
4	1	2012/4/4	2015-10-01	2013-10-14	41	1	18	1	55	1	0	0	2	3	5	2	16	16	1	1
5	1	2013-09-23	2020-02-01	2016-11-14	76	1	37	1	57	1	1	1	1	1	6	3	11	17	0.65	1
6	1	2013-09-20	2017-07-01	2017-01-17	45	1	39	1	52	1	1	1	1	2	6	3	14	29	0.48	3
7	1	2013/8/14	2017-05-11	2014/7	44	1	10	1	42	1	0	0	1	2	5	2	3	15	0.2	1
8	1	2013-08-06	2017-10-14	2016-09-28	50	1	37	1	60	2	0	0	1	2	6	3	10	27	0.37	0
9	1	2013-12-12	2016-12-01	2016-09-28	35	1	33	1	43	2	0	0	1	2	3	2	6	12	0.5	0
10	1	2013-01-17	2015-04-01	2015-04-01	26	1	26	1	64	1	0	0	1	2	4	1	2	19	0.11	1
11	1	2013/10/31	2015-01-01	2014-07-08	14	1	8	1	53	1	0	0	1	3	3	0	0	26	0	1
12	1	2013-09-27	2016-09-30	2016-01-03	36	1	27	1	65	1	1	1	1	2	6	1	2	17	0.12	0
13	1	2013-07-30	2015-12-01	2015-12-01	28	0	28	0	55	1	1	1	1	3	6	2	4	16	0.25	3
14	1	2013-06-13	2021-01-04	2020-06-01	90	1	83	1	37	2	0	0	1	2	4	1	1	29	0.03	0
15	1	2013-06-17	2015-10-01	2014-01-15	27	1	6	1	59	1	0	1	1	2	7	3	17	18	0.94	0
16	1	2013-03-13	2014-08-01	2014-02-01	16	1	10	1	59	1	1	1	1	2	6	3	8	14	0.57	2
17	1	2013-11-06	2017-10-15	2017-03-11	47	1	40	1	52	2	0	0	1	2	7	3	12	46	0.26	2
18	1	2013-03-19	2022-03-01	2022-03-01	107	0	107	0	66	1	1	0	1	2	5	2	5	19	0.26	3
19	1	2013/2/25	2013-12-01	2013/5/24	9	1	2	1	40	2	0	0	1	2	7	3	9	15	0.6	2
20	1	2013-06-14	2015-04-01	2015-04-01	21	1	21	1	55	2	0	0	1	2	6	3	10	29	0.34	0
21	1	2013-10-09	2015-12-01	2015-12-01	25	0	25	0	66	1	0	0	1	1	6	3	12	31	0.39	1
22	1	2013-07-25	2022-03-01	2022-03-01	103	0	103	0	63	1	0	1	1	1	6	3	11	17	0.65	1
23	1	2013/11/6	2016-07-06	2015/1/9	32	1	14	1	45	2	0	0	1	3	5	2	4	17	0.24	2
24	1	2013/9/18	2014-10-17	2014/5/13	12	1	7	1	29	2	0	0	1	2	3	0	0	33	0	0
25	1	2013-07-08	2015-12-01	2015-12-01	28	0	28	0	44	2	0	0	2	3	4	1	2	27	0.07	0
26	1	2013-01-04	2022-03-01	2022-03-01	109	0	109	0	46	1	1	0	1	2	6	2	3	16	0.19	0
27	1	2014-10-13	2016-03-03	2015-09-02	16	1	10	1	52	1	1	1	1	2	5	0	0	31	0	0
28	1	2014-8-8	2015-12-03	2015-12-03	15	1	15	1	41	1	1	0	1	3	5	3	15	22	0.68	0
29	1	2014-8-28	2022-03-01	2015-08-18	90	0	11	1	67	2	0	0	1	3	3	0	0	14	0	0
30	1	2014-11-27	2016-02-01	2015-08-25	14	1	8	1	57	1	0	0	1	1	4	1	1	13	0.08	2
31	1	2014-8-4	2016-05-01	2016-05-01	20	1	20	1	47	1	0	0	1	2	7	3	12	25	0.48	0
32	1	2014-3-17	2016-03-01	2016-03-01	23	1	23	1	63	1	1	0	1	2	5	2	6	17	0.35	0
33	1	2014-6-26	2018-04-01	2016-11-02	45	1	28	1	32	2	0	0	2	2	5	2	6	28	0.21	0
34	1	2014-6-23	2022-03-01	2022-03-01	92	0	92	0	67	1	1	0	1	3	3	1	1	15	0.07	0
35	1	2014-5-12	2017-01-15	2016-07-14	32	1	26	1	49	1	1	1	1	2	4	0	0	31	0	0
36	1	2014-12-11	2022-03-01	2022-03-01	86	0	86	0	53	1	0	0	1	3	5	2	3	20	0.15	0
37	1	2014-8-12	2018-10-01	2017-08-09	49	1	35	1	59	2	0	0	1	3	6	3	9	24	0.38	2
38	1	2014-7-24	2017-11-14	2017-09-01	39	1	37	1	57	1	1	1	2	2	7	3	27	38	0.71	0
39	1	2014-1-3	2015-10-03	2015-10-03	21	1	21	1	52	2	0	0	2	1	4	0	0	6	0	2
40	1	2014-7-29	2016-08-04	2016-06-24	24	1	22	1	50	1	0	1	1	3	6	3	7	10	0.7	0
41	1	2014-10-20	2016-06-15	2016-06-15	19	1	19	1	44	2	0	0	1	2	5	2	3	20	0.15	0
42	1	2014-3-27	2022-03-01	2022-03-01	95	0	95	0	46	1	1	0	1	2	5	0	27	32	0.06	2
43	1	2014-3-24	2017-10-03	2016-10-01	42	1	30	1	45	1	0	0	1	2	3	1	1	26	0.04	1
44	1	2014-2-27	2017-09-01	2016-09-01	42	1	30	1	63	1	1	0	1	2	6	3	10	39	0.26	0
45	1	2014-11-14	2022-03-01	2022-03-01	87	0	87	0	46	1	1	0	1	3	5	2	4	33	0.12	2
46	1	2014-6-16	2017-06-01	2017-04-16	35	1	34	1	61	1	0	0	1	3	6	3	10	32	0.31	0
47	1	2014-10-27	2015-09-17	2015-06-01	10	1	7	1	44	1	0	0	1	2	6	1	1	19	0.05	1
48	1	2014-9-9	2016-09-20	2015-09-23	24	1	12	1	49	1	0	0	1	3	6	2	3	12	0.25	0
49	1	2014-5-14	2017-06-01	2017-02-16	36	1	33	1	67	1	1	1	1	2	6	1	2	10	0.2	0
50	1	2014-9-1	2017-04-01	2017-03-28	31	1	30	1	57	2	0	0	1	3	6	3	9	9	1	3
51	1	2014-7-10	2022-03-01	2022-03-01	91	0	91	0	53	2	0	0	1	3	5	2	3	21	0.14	1
52	1	2014-1-24	2017-11-17	2015-07-15	45	1	17	1	44	1	1	0	1	2	3	0	0	42	0	1
53	1	2013-12-12	2017-01-01	2016-09-23	36	1	33	1	43	2	0	0	2	2	3	2	6	12	0.5	0
54	1	2014-1-15	2015-10-01	2014-10-18	20	1	9	1	65	1	0	0	1	2	6	3	12	27	0.44	2
55	1	2014-3-31	2016-03-12	2015/11/3	23	1	19	1	55	2	0	0	1	2	7	3	9	21	0.43	1
56	1	2014-9-10	2017-05-01	2017-05-01	31	1	31	1	76	2	0	0	1	2	5	3	11	15	0.73	0
57	1	2014-10-20	2016-07-19	2015/2/3	20	1	3	1	65	2	0	0	1	2	6	3	8	20	0.4	0
58	1	2015-04-06	2022-03-01	2022-03-01	82	0	82	0	59	2	0	0	1	3	5	3	9	11	0.82	0
59	1	2015-5-28	2020-06-01	2016-01-07	60	1	7	1	53	2	0	0	1	2	5	0	0	4	0	0
60	1	2015-02-06	2017-10-03	2016-11-23	31	1	21	1	41	2	0	0	1	3	6	3	10	11	0.91	0
61	1	2015-12-29	2019-02-03	2018-07-11	37	1	30	1	52	1	0	0	1	2	6	3	13	16	0.81	0
62	1	2015-8-24	2022-03-01	2022-03-01	78	0	78	0	21	1	0	0	1	3	6	2	4	19	0.21	0
63	1	2015-6-22	2022-03-01	2022-03-01	80	0	80	0	47	1	0	0	1	2	5	0	0	6	0	0
64	1	2015-9-1	2020-08-01	2019-10-01	59	1	49	1	57	1	0	0	1	2	5	2	4	4	1	1
65	1	2015-05-14	2022-03-01	2022-03-01	81	0	81	0	47	1	0	0	2	1	5	2	3	69	0.04	1
66	1	2015-11-5	2022-03-01	2022-03-01	75	0	75	0	63	2	0	0	1	2	5	2	4	11	0.36	0
67	1	2015-9-24	2022-03-01	2022-03-01	77	0	77	0	68	1	1	1	1	1	5	2	3	37	0.08	0
68	1	2015-10-6	2016-06-01	2016-06-01	7	1	7	1	53	1	1	0	2	3	5	1	1	55	0.02	1
69	1	2015-06-04	2016-04-01	2016-04-01	9	1	9	1	55	1	1	0	1	3	4	1	1	33	0.03	2
70	1	2015-9-29	2017-05-04	2016-11-21	19	1	13	1	50	2	0	0	1	3	4	0	0	23	0	0
71	1	2015-12-14	2022-03-01	2021-03-01	74	0	62	1	57	1	1	1	1	1	4	1	2	15	0.13	0
72	1	2015-9-10	2019-02-23	2018-07-12	41	1	34	1	60	1	0	1	1	2	6	3	13	15	0.87	0
73	1	2015-10-7	2018-10-12	2017-11-01	36	1	24	1	52	1	0	0	1	3	3	0	0	8	0	0
74	1	2015-01-06	2018-09-20	2018-09-20	44	1	44	1	52	1	1	0	1	2	5	0	3	22	0.14	0
75	1	2015-12-2	2021-03-01	2018-04-18	62	1	28	1	50	2	0	0	1	2	3	0	0	25	0	0
76	1	2015-03-24	2022-03-01	2022-03-01	83	0	83	0	46	1	0	0	1	3	5	0	0	8	0	0
77	1	2015-7-7	2016-03-01	2015-12-03	7	1	4	1	59	1	1	0	1	3	7	3	10	19	0.53	3
78	1	2015-06-22	2022-03-01	2022-03-01	80	0	80	0	45	1	0	0	1	3	7	3	8	10	0.8	0
79	1	2015/5/7	2017-05-13	2016-07-01	24	1	13	1	60	1	0	1	1	2	6	2	7	21	0.33	1
80	1	2015-11-11	2022-03-01	2022-03-01	75	0	75	0	56	1	1	1	2	1	7	3	17	21	0.81	2
81	1	2015-05-12	2017-06-15	2016-01-01	25	1	7	1	72	1	0	0	1	1	6	3	6	14	0.43	0
82	1	2015-03-03	2017-02-06	2016-09-01	23	1	17	1	56	1	1	1	1	3	6	2	5	31	0.16	0
83	1	2015-10-14	2020-08-26	2020-03-01	58	1	52	1	60	1	0	1	1	3	7	3	12	27	0.44	1
84	1	2015-11-18	2016-12-15	2016-09-14	12	1	9	1	51	1	0	0	1	1	6	3	7	60	0.12	0
85	1	2015-7-23	2016-08-30	2016-03-03	13	1	7	1	48	2	0	0	1	1	4	1	3	23	0.13	0
86	1	2015-01-16	2022-03-01	2022-03-01	85	0	85	0	59	1	1	0	1	2	4	1	1	31	0.03	3
87	1	2015-12-10	2017-02-01	2016-05-27	13	1	5	1	62	1	1	0	1	1	7	3	17	22	0.77	1
88	1	2016-10-24	2018-05-17	2018-02-01	18	1	15	1	50	2	0	0	1	2	4	0	3	16	0.19	0
89	1	2016-12-16	2021-06-01	2020-04-01	53	1	39	1	64	2	0	0	1	3	4	0	0	13	0	3
90	1	2016-11-10	2018-02-25	2017-12-14	15	1	13	1	48	1	0	0	1	2	3	0	0	13	0	0
91	1	2016-11-7	2020-04-13	2019-04-25	41	1	29	1	58	1	0	0	1	3	6	2	4	23	0.17	2
92	1	2016-11-4	2019-11-01	2018-08-01	35	1	20	1	51	1	1	1	1	1	4	2	4	47	0.09	0
93	1	2016-7-20	2018-07-01	2018-01-12	23	1	17	1	54	1	0	0	1	2	6	1	1	33	0.03	2
94	1	2016-5-12	2021-07-01	2021-02-01	61	1	56	1	51	2	0	0	1	2	3	0	0	16	0	1
95	1	2016-12-14	2021-08-01	2018-03-01	55	1	14	1	45	2	0	0	1	2	5	2	4	13	0.31	1
96	1	2016-3-30	2020-05-01	2018-06-14	49	1	26	1	47	1	1	1	2	1	6	3	9	9	1	1
97	1	2016-7-26	2018-08-17	2018-04-09	24	1	20	1	54	1	0	0	1	2	7	3	18	32	0.56	0
98	1	2016-7-28	2018-05-23	2018-01-01	21	1	17	1	59	1	1	1	1	2	7	3	11	12	0.92	0
99	1	2016-11-23	2019-10-01	2018-12-01	34	1	24	1	49	1	1	1	2	1	7	3	12	22	0.55	0
100	1	2016-3-28	2022-03-01	2022-03-01	71	0	71	0	42	2	0	0	1	2	3	0	0	15	0	0
101	1	2016-7-25	2018-12-01	2018-08-21	28	1	24	1	52	1	0	0	1	2	3	0	2	44	0.05	0
102	1	2016-8-4	2017-12-01	2017-03-02	15	1	6	1	63	1	0	0	1	2	6	3	10	25	0.4	1
103	1	2016-10-25	2022-03-01	2022-03-01	64	0	64	0	47	1	0	0	2	2	4	1	0	26	0	0
104	1	2016-7-7	2018-05-13	2018-02-27	22	1	19	1	43	1	1	1	1	2	6	3	10	13	0.77	0
105	1	2016-9-30	2019-10-31	2019-10-31	37	0	37	0	52	1	1	1	1	2	5	3	10	15	0.67	4
106	1	2016-4-20	2022-03-01	2017-03-29	70	0	11	1	64	1	1	1	1	2	5	2	4	9	0.44	0
107	1	2016-5-31	2018-07-16	2018-03-28	25	1	21	1	45	1	0	0	1	1	5	0	0	11	0	3
108	1	2016-4-12	2018-07-01	2018-07-01	26	1	26	1	37	2	0	0	1	2	5	0	0	25	0	0
109	1	2016-11-8	2019-05-16	2019-03-04	30	1	27	1	54	1	1	1	1	3	7	3	11	21	0.52	0
110	1	2016-1-5	2022-03-01	2022-03-01	73	0	73	0	43	1	1	1	1	2	6	3	7	12	0.58	0
111	1	2016-12-8	2017-10-03	2017-07-07	9	1	6	1	60	1	1	0	1	1	7	3	18	24	0.75	0
112	1	2014-08-12	2017-08-01	2016-05-05	35	1	20	1	51	1	0	0	1	2	5	0	3	8	0.38	3
113	1	2016-4-18	2018-07-01	2017-12-18	26	1	20	1	48	2	0	0	1	2	7	3	13	25	0.52	0
114	1	2016-8-31	2022-03-01	2022-03-01	66	0	66	0	50	1	1	1	1	3	5	2	4	18	0.22	1
115	1	2016-4-29	2022-03-01	2022-03-01	70	0	70	0	63	1	0	0	1	2	3	0	0	13	0	0
116	1	2016-3-7	2017-04-16	2016-12-01	13	1	8	1	67	1	0	0	1	2	7	3	14	20	0.7	0
117	1	2016-10-21	2021-03-01	2019-08-01	52	1	33	1	59	1	0	0	1	3	7	3	18	23	0.78	0
118	1	2016-11-30	2018-07-01	2018-02-28	19	1	14	1	60	2	0	0	1	2	7	3	10	19	0.53	0
119	1	2016-11-24	2017-12-15	2017-03-28	12	1	4	1	59	2	1	0	1	2	6	3	9	9	1	3
120	1	2016-9-8	2018-05-11	2017-12-15	20	1	15	1	48	1	1	1	1	2	6	1	2	15	0.13	0
121	1	2016-2-24	2019-02-01	2017-11-27	35	1	21	1	37	1	1	0	1	3	6	3	9	11	0.82	0
122	1	2016-6-20	2022-03-01	2022-03-01	68	0	68	0	51	1	0	1	2	2	5	0	0	31	0	0
123	1	2016-11-3	2022-03-01	2022-03-01	63	0	63	0	47	1	0	0	1	2	5	2	4	29	0.14	2
124	1	2016-1-18	2016-11-15	2016-06-20	9	1	5	1	40	2	0	0	1	3	7	3	8	21	0.38	0
125	1	2016-7-11	2017-12-03	2017-12-03	16	1	16	1	50	1	1	1	1	2	7	3	17	29	0.59	0
126	1	2016-5-18	2018-02-01	2017-11-24	20	1	18	1	63	1	0	0	1	2	7	3	16	31	0.52	0
127	1	2017-1-16	2018-10-01	2017-09-20	20	1	8	1	70	1	1	0	1	3	6	2	5	12	0.42	0
128	1	2017-5-24	2020-02-01	2019-03-29	32	1	22	1	55	1	0	0	1	3	5	2	3	26	0.12	3
129	1	2017-9-6	2022-03-01	2022-03-01	53	0	53	0	54	1	0	0	1	2	6	1	1	4	0.25	0
130	1	2017-9-14	2021-08-11	2021-01-05	46	1	39	1	53	1	1	1	1	2	7	3	18	23	0.78	1
131	1	2017-12-5	2019-03-27	2018-11-04	15	1	10	1	50	1	0	0	1	2	6	3	15	39	0.38	0
132	1	2017-4-17	2021-10-01	2020-08-01	53	1	39	1	66	1	1	0	1	2	3	1	1	41	0.02	1
133	1	2017-4-7	2018-12-15	2018-07-23	20	1	15	1	54	2	0	0	1	1	6	3	13	15	0.87	1
134	1	2017-9-21	2022-03-01	2022-03-01	53	0	53	0	51	1	0	0	2	2	6	3	7	19	0.37	0
135	1	2017-5-31	2022-03-01	2022-03-01	57	0	57	0	62	1	1	1	1	2	6	3	10	33	0.3	0
136	1	2017-8-14	2019-05-01	2019-01-04	20	1	16	1	47	1	0	0	1	2	3	0	0	10	0	1
137	1	2017-9-20	2022-03-01	2022-03-01	53	0	53	0	55	2	0	0	1	2	5	1	2	19	0.11	0
138	1	2017-10-19	2019-01-22	2018-10-25	15	1	12	1	53	2	0	0	2	2	3	0	0	13	0	1
139	1	2017-3-23	2020-07-01	2020-07-01	39	1	39	1	60	1	0	1	1	1	5	2	4	31	0.13	0
140	1	2017-2-8	2022-03-01	2022-03-01	60	0	60	0	43	2	0	0	1	2	5	2	3	13	0.23	1
141	1	2017-3-3	2022-03-01	2022-03-01	59	0	59	0	48	1	0	0	1	3	6	1	1	33	0.03	0
142	1	2017-3-9	2022-03-01	2022-03-01	59	0	59	0	57	1	1	0	1	2	6	1	1	20	0.05	1
143	1	2017-10-10	2022-03-01	2022-03-01	52	0	52	0	45	1	1	0	1	2	3	0	0	21	0	2
144	1	2017-1-18	2022-03-01	2022-03-01	61	0	61	0	62	2	0	1	1	3	6	2	3	15	0.2	0
145	1	2017-7-7	2022-03-01	2022-03-01	55	0	55	0	45	2	0	0	1	3	6	2	6	25	0.24	0
146	1	2017-3-28	2022-03-01	2022-03-01	59	0	59	0	59	2	0	0	1	1	6	3	9	22	0.41	1
147	1	2017-11-16	2018-10-22	2018-03-01	11	1	3	1	60	1	0	0	1	2	6	3	7	15	0.47	0
148	1	2017-2-16	2022-03-01	2022-03-01	60	0	60	0	65	1	0	0	1	3	5	0	0	16	0	1
149	1	2017-1-9	2022-03-01	2022-03-01	61	0	61	0	53	1	1	1	1	2	7	3	8	40	0.2	1
150	1	2017-4-26	2020-10-01	2019-12-01	41	1	31	1	52	1	0	0	1	1	5	2	4	21	0.19	2
151	1	2017-3-13	2017-07-30	2017-07-30	4	0	4	0	53	1	1	0	1	1	5	2	6	23	0.26	0
152	1	2017-9-25	2020-06-01	2020-06-01	32	1	32	1	63	1	1	0	1	3	6	3	10	30	0.33	0
153	1	2017-5-8	2022-03-01	2022-03-01	57	0	57	0	41	2	0	0	1	2	4	0	0	34	0	0
154	1	2014-11-24	2022-03-01	2022-03-01	87	0	87	0	70	1	0	0	1	2	5	0	0	9	0	1
155	1	2017-8-10	2022-03-01	2022-03-01	54	0	54	0	65	1	1	1	1	2	7	3	12	28	0.43	0
156	1	2017-9-12	2022-03-01	2022-03-01	53	0	53	0	52	1	1	0	1	1	3	1	2	21	0.1	0
157	1	2017-6-30	2022-03-01	2022-03-01	56	0	56	0	66	1	1	0	1	3	6	2	3	18	0.17	1
158	1	2017-11-13	2019-05-07	2018/12/11	17	1	12	1	73	1	1	0	1	1	6	3	13	28	0.46	0
159	1	2017-8-10	2019-08-01	2018-04-11	23	1	8	1	32	2	0	0	1	3	6	3	7	12	0.58	0
160	1	2017-2-10	2019-10-31	2019-10-31	32	0	32	0	56	1	0	0	1	2	6	3	12	47	0.26	0
161	1	2017-1-2	2018-05-17	2017-12-11	16	1	11	1	61	1	1	1	1	2	7	3	10	19	0.53	0
162	1	2017-11-30	2018-12-20	2018-09-21	12	1	9	1	53	2	0	0	1	3	3	3	3	12	0.25	0
163	2	2013-12-16	2016-03-15	2015-06-15	26	0	17	1	61	1	1	0	1	1	4	2	3	13	0.23	1
164	2	2013-11-26	2016-03-15	2016-03-15	27	0	27	0	45	1	1	1	1	2	4	1	2	5	0.4	0
165	2	2013-10-17	2016-03-15	2016-03-15	28	0	28	0	56	1	1	1	1	2	4	1	1	35	0.03	0
166	2	2013-08-29	2016-03-15	2016-03-15	30	0	30	0	56	1	0	0	1	2	5	3	10	23	0.43	1
167	2	2013-07-23	2016-03-15	2016-03-15	31	0	31	0	57	2	0	0	2	2	6	3	11	39	0.28	1
168	2	2013-07-02	2016-03-15	2016-03-15	32	0	32	0	56	2	0	0	1	2	6	3	7	11	0.64	1
169	2	2013-11-26	2016-03-15	2016-03-15	27	0	27	0	52	1	1	0	1	2	5	2	3	12	0.25	1
170	2	2013-10-17	2022-03-01	2022-03-01	100	0	100	0	48	2	0	0	1	3	6	3	8	12	0.67	1
171	2	2013-12-16	2022-03-01	2022-03-01	98	0	98	0	43	1	0	0	1	1	3	0	0	14	0	0
172	2	2013-12-11	2022-03-01	2017-10-15	98	0	46	1	41	1	0	0	1	2	4	0	0	24	0	0
173	2	2013-07-15	2022-03-01	2022-03-01	103	0	103	0	48	2	0	0	1	2	3	0	0	12	0	1
174	2	2013-05-27	2022-03-01	2022-03-01	105	0	105	0	58	1	1	1	1	1	6	3	15	37	0.41	1
175	2	2013-05-09	2021-10-01	2021-10-01	100	1	100	1	55	1	0	0	1	2	6	1	2	16	0.13	2
176	2	2013-04-12	2022-03-01	2022-03-01	106	0	106	0	39	2	0	0	1	3	4	2	3	12	0.25	1
177	2	2013-05-08	2022-03-01	2022-03-01	105	0	105	0	51	1	1	0	1	2	7	3	21	24	0.88	0
178	2	2013-10-21	2014-08-18	2014-03-14	9	1	4	1	65	1	0	0	1	2	6	3	10	31	0.32	1
179	2	2013-08-20	2014-12-02	2014-12-02	15	1	15	1	69	1	1	1	2	2	5	0	0	9	0	2
180	2	2013-08-01	2014-08-15	2014-08-15	12	1	12	1	57	1	1	0	1	3	7	3	17	27	0.63	0
181	2	2013-08-07	2016-09-15	2014-07-08	37	1	11	1	53	1	0	0	1	3	6	3	13	15	0.87	1
182	2	2013-07-18	2015-06-15	2014-03-09	22	1	7	1	47	2	0	0	1	2	6	3	10	11	0.91	1
183	2	2013-01-10	2018-02-01	2017-06-15	60	1	53	1	69	2	0	0	1	2	6	3	10	25	0.4	0
184	2	2012-10-15	2017-09-15	2016-06-15	59	1	44	1	62	1	1	1	1	2	5	2	5	14	0.36	2
185	2	2013-03-28	2015-01-15	2015-01-15	21	1	21	1	72	2	0	0	1	2	3	0	0	42	0	1
186	2	2013-05-02	2016-05-03	2014-04-04	36	1	11	1	61	1	0	1	1	1	4	1	2	2	1	1
187	2	2013-07-12	2016-11-01	2015-08-13	39	1	25	1	46	1	0	1	1	2	6	3	7	15	0.47	1
188	2	2013-11-19	2022-03-01	2022-03-01	99	0	99	0	55	1	1	0	1	2	5	2	5	10	0.5	0
189	2	2014-03-21	2022-03-01	2022-03-01	95	0	95	0	54	1	1	1	1	2	5	2	3	10	0.3	2
190	2	2014-04-07	2022-03-01	2022-03-01	94	0	94	0	25	1	0	0	2	1	3	2	6	39	0.15	2
191	2	2014-05-13	2022-03-01	2022-03-01	93	0	93	0	59	1	1	1	1	2	4	1	1	28	0.04	2
192	2	2014-03-11	2020-12-01	2020-12-01	80	1	80	1	50	1	0	0	1	2	7	3	9	18	0.5	4
193	2	2014-04-07	2022-03-01	2022-03-01	94	0	94	0	32	1	0	0	1	2	5	3	11	37	0.3	0
194	2	2014-07-17	2022-03-01	2022-03-01	91	0	91	0	61	1	1	0	1	2	3	1	2	22	0.09	0
195	2	2014-05-14	2022-03-01	2022-03-01	93	0	93	0	50	1	0	0	1	2	4	1	1	14	0.07	4
196	2	2014-09-01	2021-02-01	2018-07-31	77	1	46	1	61	2	0	0	1	1	3	0	0	19	0	0
197	2	2014-09-30	2019-08-01	2018-12-13	58	1	50	1	35	1	0	0	2	2	3	0	14	24	0.58	0
198	2	2015-05-14	2022-03-01	2022-03-01	81	0	81	0	60	1	1		1	3	5	2	4	20	0.2	4
199	2	2014-05-09	2022-03-01	2022-03-01	93	0	93	0	51	1	0	0	1	3	5	3	8	19	0.42	0
200	2	2014-07-21	2022-03-01	2022-03-01	91	0	91	0	49	1	0	0	1	3	6	3	9	16	0.56	1
201	2	2014-06-09	2020-10-01	2018-11-14	75	1	53	1	58	1	0	0	1	2	7	3	19	24	0.79	0
202	2	2014-04-10	2016-03-15	2016-03-15	23	0	23	0	39	2	0	0	1	2	4	1	1	39	0.03	2
203	2	2014-04-16	2015-04-01	2014-12-15	11	1	7	1	36	1	0	0	2	2	6	3	16	32	0.5	1
204	2	2014-05-04	2016-03-15	2016-03-15	22	0	22	0	51	2	0	0	2	2	5	2	4	14	0.29	0
205	2	2014-06-23	2016-03-15	2016-03-15	20	0	20	0	56	1	1	1	1	1	3	2	3	19	0.16	3
206	2	2014-03-01	2016-03-15	2016-03-15	24	0	24	0	43	1	0	0	1	2	3	0	0	5	0	0
207	2	2014-03-05	2016-02-26	2015-04-22	23	1	13	1	52	1	1	1	1	2	5	3	7	15	0.47	1
208	2	2014-01-21	2017-02-15	2015-08-09	36	1	18	1	57	1	1	1	2	2	3	0	0	22	0	4
209	2	2014-06-11	2017-11-01	2016-05-01	40	1	22	1	59	1	1	0	2	1	6	3	9	28	0.32	0
210	2	2014-07-01	2017-02-15	2017-02-15	31	1	31	1	49	1	0	0	1	1	5	2	3	24	0.13	0
211	2	2014-07-24	2015-06-15	2015-06-15	10	1	10	1	60	1	0	0	1	1	6	3	9	25	0.36	1
212	2	2013-09-13	2016-07-05	2015-08-24	33	1	23	1	41	2	0	0	2	2	6	2	6	22	0.27	0
213	2	2014-05-21	2015-06-23	2015-01-15	13	1	7	1	29	1	0	0	1	2	6	2	5	23	0.22	0
214	2	2013-11-14	2014-10-15	2014-10-15	11	1	11	1	70	1	1	0	1	3	6	3	12	13	0.92	4
215	2	2014-06-30	2015-09-01	2015-02-08	14	1	7	1	50	1	1	0	1	3	6	3	8	8	1	0
216	2	2014-05-07	2015-07-16	2015-07-16	14	1	14	1	46	1	0	0	1	3	3	0	0	12	0	4
217	2	2013-12-09	2017-08-20	2017-08-20	44	1	44	1	46	1	0	1	1	2	3	0	0	18	0	1
218	2	2013-10-10	2017-11-28	2017-11-28	49	1	49	1	62	1	1	0	1	3	6	2	3	8	0.38	0
219	2	2013-12-14	2015-01-15	2014-12-02	13	1	11	1	52	1	1	1	1	3	7	3	7	7	1	0
220	2	2014-06-26	2017-04-01	2016-11-01	33	1	28	1	53	2	0	0	2	3	5	2	3	15	0.2	2
221	2	2014-11-19	2016-05-14	2015-10-20	17	1	11	1	52	1	0	0	1	2	6	3	8	23	0.35	1
222	2	2015-10-20	2022-03-01	2022-03-01	76	0	76	0	59	1	1	1	1	3	5	0	0	15	0	3
223	2	2015-10-08	2022-03-01	2016-05-01	76	0	6	1	57	1	0	0	1	2	5	2	6	37	0.16	0
224	2	2015-07-13	2022-03-01	2021-09-01	79	0	73	1	39	2	0	0	1	2	7	3	10	10	1	4
225	2	2015-04-23	2022-03-01	2022-03-01	82	0	82	0	26	1	0	0	2	3	6	3	13	18	0.72	0
226	2	2014-12-01	2022-03-01	2022-03-01	87	0	87	0	64	1	1	0	1	1	3	2	3	47	0.06	0
227	2	2014-10-15	2022-01-01	2020-06-01	86	1	67	1	53	2	0	0	1	3	5	2	6	67	0.09	1
228	2	2014-09-18	2022-03-01	2022-03-01	89	0	89	0	69	1	1	1	1	3	5	2	6	23	0.26	0
229	2	2015-06-03	2022-03-01	2022-03-01	80	0	80	0	54	1	1	1	1	2	5	2	5	17	0.29	1
230	2	2014-09-22	2022-03-01	2022-03-01	89	0	89	0	53	1	1	1	1	3	5	2	3	31	0.1	2
231	2	2015-05-25	2022-03-01	2022-03-01	81	0	81	0	58	1	0	0	1	1	5	2	3	17	0.18	3
232	2	2015-06-15	2022-03-01	2022-03-01	80	0	80	0	66	1	1	0	2	3	4	1	1	28	0.04	1
233	2	2015-09-22	2022-03-01	2022-03-01	77	0	77	0	53	1	1	0	1	1	3	0	0	18	0	0
234	2	2015-06-08	2022-03-01	2022-03-01	80	0	80	0	42	1	0	0	1	2	6	3	9	35	0.26	0
235	2	2014-8-7	2022-03-01	2022-03-01	90	0	90	0	52	2	0	0	1	1	6	3	11	28	0.39	0
236	2	2015-05-14	2018-03-01	2016-03-15	33	0	10	0	51	1	0	0	2	1	3	0	0	6	0	0
237	2	2014-10-10	2016-10-01	2016-03-01	23	1	16	1	65	1	1	1	1	3	6	3	9	20	0.45	0
238	2	2015-03-27	2018-03-01	2018-03-01	35	0	35	0	56	2	0	0	2	2	3	0	0	13	0	0
239	2	2014-11-11	2015-09-10	2015-09-10	9	1	9	1	62	1	1	1	1	1	5	2	5	10	0.5	0
240	2	2014-11-24	2015-12-20	2015-12-20	12	1	12	1	68	2	0	0	1	2	7	3	23	37	0.62	2
241	2	2015-03-27	2016-03-02	2015-12-16	11	1	8	1	45	1	1	0	1	2	7	3	7	16	0.44	0
242	2	2015-03-20	2016-06-09	2016-04-08	14	1	12	1	58	2	0	1	2	1	6	2	4	18	0.22	4
243	2	2014-01-19	2016-02-26	2015-08-11	25	1	18	1	50	2	0	0	1	2	7	3	17	32	0.53	0
244	2	2015-07-22	2016-07-26	2016-05-31	12	1	10	1	70	1	1	1	1	2	6	3	8	24	0.33	0
245	2	2015-01-13	2016-09-01	2016-02-16	19	1	13	1	59	1	0	0	1	1	6	2	5	22	0.23	0
246	2	2015-07-23	2017-03-01	2016-08-01	19	1	12	1	52	1	0	0	1	2	7	3	16	25	0.64	0
247	2	2014-12-10	2017-03-01	2016-11-01	26	1	22	1	47	1	1	0	1	1	6	2	3	5	0.6	0
248	2	2015-05-12	2017-08-11	2016-12-01	26	1	18	1	51	1	1	0	1	1	4	2	3	37	0.08	2
249	2	2014-12-24	2017-08-20	2017-08-20	31	1	31	1	25	1	0	0	2	2	3	0	0	27	0	0
250	2	2015-06-04	2017-11-01	2017-04-01	28	1	21	1	36	1	0	0	2	1	3	1	1	37	0.03	3
251	2	2015-04-02	2018-08-20	2017-07-01	40	1	26	1	28	2	0	0	1	3	7	3	9	15	0.6	4
252	2	2015-04-18	2018-07-13	2017-12-17	38	1	31	1	56	1	0	0	2	2	5	2	4	16	0.25	0
253	2	2015-06-03	2018-10-07	2018-07-03	40	1	37	1	52	1	0	0	1	1	4	1	3	32	0.09	2
254	2	2015-08-13	2019-02-14	2017-03-01	42	1	18	1	69	1	0	0	1	2	4	0	0	13	0	0
255	2	2015-12-08	2022-03-01	2022-03-01	74	0	74	0	40	2	0	0	1	3	4	2	4	7	0.57	0
256	2	2015-09-17	2022-03-01	2022-03-01	77	0	77	0	60	2	0	0	2	1	4	1	1	29	0.03	1
257	2	2015-12-09	2022-03-01	2022-03-01	74	0	74	0	47	1	0	0	1	3	3	2	4	10	0.4	0
258	2	2015-08-11	2022-03-01	2022-03-01	78	0	78	0	61	1	1	0	1	2	6	2	4	9	0.44	0
259	2	2016-02-15	2021-10-08	2021-01-19	67	1	59	1	67	1	0	0	1	3	3	0	0	27	0	1
260	2	2015-12-28	2022-03-01	2022-03-01	74	0	74	0	50	1	1	1	1	2	4	2	5	26	0.19	1
261	2	2016-02-18	2022-03-01	2022-03-01	72	0	72	0	55	2	0	0	1	1	3	1	2	18	0.11	0
262	2	2016-03-07	2022-03-01	2022-03-01	71	0	71	0	30	2	0	0	1	3	5	3	7	20	0.35	4
263	2	2016-03-31	2022-03-01	2022-03-01	71	0	71	0	52	1	1	0	1	2	7	3	9	25	0.36	0
264	2	2016-05-05	2022-03-01	2022-03-01	69	0	69	0	63	2	0	0	2	3	7	3	20	29	0.69	3
265	2	2016-03-23	2021-10-08	2021-02-01	66	1	58	1	58	1	1	1	1	2	4	1	1	31	0.03	3
266	2	2016-05-26	2022-03-01	2022-03-01	69	0	69	0	44	1	1	0	1	3	5	2	4	32	0.13	0
267	2	2016-04-28	2022-03-01	2022-03-01	70	0	70	0	47	1	0	0	1	3	4	2	3	17	0.18	1
268	2	2016-06-20	2022-03-01	2022-03-01	68	0	68	0	38	1	0	0	1	2	6	1	2	22	0.09	2
269	2	2016-04-26	2022-03-01	2022-03-01	70	0	70	0	47	1	1	1	1	2	5	2	4	13	0.31	0
270	2	2016-07-04	2022-03-01	2022-03-01	67	0	67	0	35	1	0	1	1	3	7	3	18	18	1	0
271	2	2015-05-27	2016/9／15	2016-07-01	15	1	13	1	44	1	1	0	1	2	5	3	19	26	0.73	1
272	2	2014-01-26	2016/2/26	2015-06-07	25	1	16	1	38	2	0	0	1	1	5	3	10	10	1	0
273	2	2015-11-20	2017/8/10	2017-03-23	20	1	16	1	56	1	1	1	1	3	7	3	13	21	0.62	3
274	2	2015-12-23	2016/7/20	2016-05-11	6	1	4	1	39	1	1	1	1	3	6	3	7	16	0.44	1
275	2	2015-11-23	2017/5/11	2017-03-01	17	1	15	1	61	1	1	1	1	2	7	3	13	19	0.68	3
276	2	2016-01-06	2016/12/10	2016-07-01	11	1	5	1	51	1	1	1	1	1	5	3	9	42	0.21	4
277	2	2015-12-24	2017/2／15	2016-10-01	13	1	9	1	49	2	0	0	1	2	7	3	24	26	0.92	1
278	2	2015-09-22	2017/8/10	2016-11-15	22	1	13	1	50	1	1	1	1	3	5	2	5	25	0.2	0
279	2	2016-04-26	2017/10	2017-03-15	17	1	10	1	66	1	0	0	1	2	3	2	2	20	0.1	0
280	2	2016-01-28	2017/8/10	2017-03-17	18	1	13	1	64	1	0	0	1	2	7	3	14	14	1	0
281	2	2015-12-29	2017/7/10	2017-04-01	18	1	15	1	58	1	1	0	1	2	7	3	12	16	0.75	4
282	2	2016-04-20	2017/4/20	2017-02-24	12	1	10	1	57	2	0	0	1	2	7	3	16	24	0.67	1
283	2	2015-10-27	2018/1/26	2016-03-01	26	1	4	1	61	1	1	1	1	3	7	3	16	16	1	0
284	2	2015-10-07	2018/3/15	2017-09-13	29	1	23	1	50	1	1	1	1	1	6	2	5	6	0.83	1
285	2	2016-01-20	2018/3/17	2017-11-01	25	1	21	1	44	1	0	0	1	2	6	3	9	21	0.43	1
286	2	2015-04-05	2018/12	2018-03-04	43	1	34	1	50	2	0	0	2	2	3	0	0	35	0	0
287	2	2016-06-20	2018/7/16	2017-06-09	24	1	11	1	42	1	0	0	1	2	5	3	13	26	0.5	0
288	2	2016-08-04	2017/11／4	2017-04-18	15	1	8	1	41	1	0	0	1	2	5	2	4	12	0.33	2
289	2	2015-7-30	2016-08-10	2016-03-01	12	1	7	1	37	2	0	0	1	2	7	3	13	20	0.65	0
290	2	2015-10-21	2019-01-16	2018-01-01	38	1	26	1	53	1	0	0	1	3	6	3	11	23	0.48	3
291	2	2016-03-08	2018-07-24	2018-07-24	28	1	28	1	48	1	0	1	1	2	6	3	15	27	0.56	1
292	2	2016-07-08	2018-06-26	2017-07-01	23	1	11	1	26	2	0	0	2	2	7	3	8	50	0.16	1
293	2	2015-07-28	2017-03-15	2017-03-15	19	0	19	0	57	1	0	0	1	2	7	3	22	30	0.73	1
294	2	2015-12-10	2017-03-15	2017-03-15	15	0	15	0	62	1	1	0	1	2	7	3	17	31	0.55	1
295	2	2016-12-01	2022-03-01	2022-03-01	63	0	63	0	59	1	1	1	2	3	6	3	7	18	0.39	0
296	2	2016-10-26	2022-03-01	2022-03-01	64	0	64	0	54	1	0	0	2	1	5	2	4	6	0.67	4
297	2	2016-12-21	2022-03-01	2022-03-01	62	0	62	0	52	1	0	0	2	2	6	1	2	6	0.33	1
298	2	2017-01-20	2020-08-01	2019/3/29	42	1	26	1	50	1	0	0	1	2	7	3	10	21	0.48	3
299	2	2016-10-26	2022-03-01	2022-03-01	64	0	64	0	42	1	0	0	1	1	6	3	9	26	0.35	0
300	2	2016-12-05	2021-10-01	2020-12-15	57	1	48	1	74	2	0	0	1	1	3	0	0	27	0	0
301	2	2016-12-22	2022-03-01	2022-03-01	62	0	62	0	59	2	0	0	1	2	6	2	6	27	0.22	4
302	2	2016-12-30	2019-06-01	2019-06-01	29	1	29	1	45	1	0	0	1	3	6	3	6	8	0.75	0
303	2	2017-03-16	2022-03-01	2022-03-01	59	0	59	0	62	1	0	1	1	3	6	3	8	20	0.4	1
304	2	2016-12-28	2022-03-01	2022-03-01	62	0	62	0	56	2	0	0	1	1	5	2	5	39	0.13	0
305	2	2017-01-02	2020-08-01	2019-11-01	42	1	33	1	56	2	0	0	1	2	3	2	2	35	0.06	1
306	2	2017-03-07	2022-03-01	2022-03-01	59	0	59	0	63	1	0	1	1	3	5	0	0	19	0	0
307	2	2017-03-21	2022-03-01	2022-03-01	59	0	59	0	37	2	0	0	1	1	5	2	6	20	0.3	0
308	2	2017-05-04	2022-03-01	2022-03-01	57	0	57	0	30	1	0	0	1	3	6	1	2	22	0.09	0
309	2	2017-01-13	2022-03-01	2022-03-01	61	0	61	0	61	1	0	0	1	2	6	3	13	26	0.5	0
310	2	2017-04-20	2022-03-01	2022-03-01	58	0	58	0	48	1	0	1	1	2	3	1	2	23	0.09	2
311	2	2017-08-07	2022-03-01	2022-03-01	54	0	54	0	41	2	0	0	1	2	6	3	7	36	0.19	0
312	2	2017-04-25	2021-01-01	2020-06-01	44	1	37	1	50	2	0	0	1	1	6	3	9	20	0.45	1
313	2	2017-07-18	2022-03-01	2022-03-01	55	0	55	0	59	1	0	0	1	2	6	3	10	26	0.38	0
314	2	2017-05-17	2022-03-01	2022-03-01	57	0	57	0	73	1	0	0	1	1	5	2	4	19	0.21	1
315	2	2017-08-09	2022-03-01	2022-03-01	54	0	54	0	50	1	0	0	2	1	5	2	5	26	0.19	0
316	2	2016-08-10	2022-03-01	2022-03-01	66	0	66	0	62	1	1	1	1	2	6	3	10	35	0.29	0
317	2	2017-04-07	2020-10-01	2020-03-01	41	1	34	1	69	1	0	0	1	2	5	2	4	17	0.24	0
318	2	2017-11-21	2020-12-01	2020-08-18	36	1	32	1	67	1	1	1	1	3	7	3	7	28	0.25	0
319	2	2017-12-26	2020-10-01	2019-11-04	33	1	22	1	52	1	1	0	1	2	3	0	1	22	0.05	0
320	2	2017-6-22	2022-03-01	2022-03-01	56	0	56	0	61	1	1	1	1	2	3	1	2	39	0.05	0
321	2	2017-6-29	2020-01-01	2018-05-28	30	1	10	1	62	1	1	0	1	2	6	3	11	15	0.73	0
322	2	2017-4-28	2022-03-01	2022-03-01	58	0	58	0	51	1	0	0	2	2	6	2	5	17	0.29	0
323	2	2016-06-08	2017-10-01	2017/4/18	15	1	10	1	47	2	0	0	1	2	7	3	16	26	0.62	0
324	2	2017-03-01	2018-06-01	2017/11	15	1	8	1	26	2	0	0	1	1	7	3	8	12	0.67	3
325	2	2017-01-19	2018-10-01	2018/3	20	1	13	1	49	2	0	0	1	2	5	2	5	10	0.5	0
326	2	2017-06-19	2018-11-26	2018/7/3	17	1	12	1	60	1	1	0	1	2	6	3	7	14	0.5	0
327	2	2017-06-22	2018/11	2018-05-14	16	1	10	1	60	1	1	1	2	3	5	2	3	18	0.17	1
328	2	2017-07-31	2018-12-01	2018/5/3	16	1	9	1	52	1	0	0	2	2	7	3	19	31	0.61	1

## Sheet: raw data
Serial Number	group	surgery date	OS date	DFSdate	OS months	OS status	DFS months	DFS status	age	gender	smoking history	drinking history	tumor differentiation	surgery	TNM stage	N stage	positiveLN number	dissectedLN number	positive LN ratio	HER2+ expression
1	ct	2013-04-05	2022-03-01	2022-03-01	106	0	106	0	66	male	yes	no	poor	BII	IIB	N1	1	23	0.04	0
2	ct	2013-04-17	2022-03-01	2022-03-01	106	0	106	0	49	male	no	no	poor	Roux-en-Y	IIB	N2	2	12	0.17	2+
3	ct	2013-11-18	2022-03-01	2022-03-01	99	0	99	0	53	male	no	yes	medium	BII	IIB	N1	2	53	0.04	0
4	ct	2012/4/4	2015-10-01	2013-10-14	41	1	18	1	55	male	no	no	medium	Roux-en-Y	IIIA	N2	16	16	1	1+
5	ct	2013-09-23	2020-02-01	2016-11-14	76	1	37	1	57	male	yes	yes	poor	BI	IIIB	N3	11	17	0.65	1+
6	ct	2013-09-20	2017-07-01	2017-01-17	45	1	39	1	52	male	yes	yes	poor	BII	IIIB	N3	14	29	0.48	3+
7	ct	2013/8/14	2017-05-11	2014/7	44	1	10	1	42	male	no	no	poor	BII	IIIA	N2	3	15	0.2	1+
8	ct	2013-08-06	2017-10-14	2016-09-28	50	1	37	1	60	female	no	no	poor	BII	IIIB	N3	10	27	0.37	0
9	ct	2013-12-12	2016-12-01	2016-09-28	35	1	33	1	43	female	no	no	poor	BII	IIA	N2	6	12	0.5	0
10	ct	2013-01-17	2015-04-01	2015-04-01	26	1	26	1	64	male	no	no	poor	BII	IIB	N1	2	19	0.11	1+
11	ct	2013/10/31	2015-01-01	2014-07-08	14	1	8	1	53	male	no	no	poor	Roux-en-Y	IIA	N0	0	26	0	1+
12	ct	2013-09-27	2016-09-30	2016-01-03	36	1	27	1	65	male	yes	yes	poor	BII	IIIB	N1	2	17	0.12	0
13	ct	2013-07-30	2015-12-01	2015-12-01	28	0	28	0	55	male	yes	yes	poor	Roux-en-Y	IIIB	N2	4	16	0.25	3+
14	ct	2013-06-13	2021-01-04	2020-06-01	90	1	83	1	37	female	no	no	poor	BII	IIB	N1	1	29	0.03	0
15	ct	2013-06-17	2015-10-01	2014-01-15	27	1	6	1	59	male	no	yes	poor	BII	IIIC	N3	17	18	0.94	0
16	ct	2013-03-13	2014-08-01	2014-02-01	16	1	10	1	59	male	yes	yes	poor	BII	IIIB	N3	8	14	0.57	2+
17	ct	2013-11-06	2017-10-15	2017-03-11	47	1	40	1	52	female	no	no	poor	BII	IIIC	N3	12	46	0.26	2+
18	ct	2013-03-19	2022-03-01	2022-03-01	107	0	107	0	66	male	yes	no	poor	BII	IIIA	N2	5	19	0.26	3+
19	ct	2013/2/25	2013-12-01	2013/5/24	9	1	2	1	40	female	no	no	poor	BII	IIIC	N3	9	15	0.6	2+
20	ct	2013-06-14	2015-04-01	2015-04-01	21	1	21	1	55	female	no	no	poor	BII	IIIB	N3	10	29	0.34	0
21	ct	2013-10-09	2015-12-01	2015-12-01	25	0	25	0	66	male	no	no	poor	BI	IIIB	N3	12	31	0.39	1+
22	ct	2013-07-25	2022-03-01	2022-03-01	103	0	103	0	63	male	no	yes	poor	BI	IIIB	N3	11	17	0.65	1+
23	ct	2013/11/6	2016-07-06	2015/1/9	32	1	14	1	45	female	no	no	poor	Roux-en-Y	IIIA	N2	4	17	0.24	2+
24	ct	2013/9/18	2014-10-17	2014/5/13	12	1	7	1	29	female	no	no	poor	BII	IIA	N0	0	33	0	0
25	ct	2013-07-08	2015-12-01	2015-12-01	28	0	28	0	44	female	no	no	well	Roux-en-Y	IIB	N1	2	27	0.07	0
26	ct	2013-01-04	2022-03-01	2022-03-01	109	0	109	0	46	male	yes	no	poor	BII	IIIB	N2	3	16	0.19	0
27	ct	2014-10-13	2016-03-03	2015-09-02	16	1	10	1	52	male	yes	yes	poor	BII	IIIA	N0	0	31	0	0
28	ct	2014-8-8	2015-12-03	2015-12-03	15	1	15	1	41	male	yes	no	poor	Roux-en-Y	IIIA	N3	15	22	0.68	0
29	ct	2014-8-28	2022-03-01	2015-08-18	90	0	11	1	67	female	no	no	poor	Roux-en-Y	IIA	N0	0	14	0	0
30	ct	2014-11-27	2016-02-01	2015-08-25	14	1	8	1	57	male	no	no	poor	BI	IIB	N1	1	13	0.08	2+
31	ct	2014-8-4	2016-05-01	2016-05-01	20	1	20	1	47	male	no	no	poor	BII	IIIC	N3	12	25	0.48	0
32	ct	2014-3-17	2016-03-01	2016-03-01	23	1	23	1	63	male	yes	no	poor	BII	IIIA	N2	6	17	0.35	0
33	ct	2014-6-26	2018-04-01	2016-11-02	45	1	28	1	32	female	no	no	medium	BII	IIIA	N2	6	28	0.21	0
34	ct	2014-6-23	2022-03-01	2022-03-01	92	0	92	0	67	male	yes	no	poor	Roux-en-Y	IIA	N1	1	15	0.07	0
35	ct	2014-5-12	2017-01-15	2016-07-14	32	1	26	1	49	male	yes	yes	poor	BII	IIB	N0	0	31	0	0
36	ct	2014-12-11	2022-03-01	2022-03-01	86	0	86	0	53	male	no	no	poor	Roux-en-Y	IIIA	N2	3	20	0.15	0
37	ct	2014-8-12	2018-10-01	2017-08-09	49	1	35	1	59	female	no	no	poor	Roux-en-Y	IIIB	N3	9	24	0.38	2+
38	ct	2014-7-24	2017-11-14	2017-09-01	39	1	37	1	57	male	yes	yes	medium	BII	IIIC	N3	27	38	0.71	0
39	ct	2014-1-3	2015-10-03	2015-10-03	21	1	21	1	52	female	no	no	well	BI	IIB	N0	0	6	0	2+
40	ct	2014-7-29	2016-08-04	2016-06-24	24	1	22	1	50	male	no	yes	poor	Roux-en-Y	IIIB	N3	7	10	0.7	0
41	ct	2014-10-20	2016-06-15	2016-06-15	19	1	19	1	44	female	no	no	poor	BII	IIIA	N2	3	20	0.15	0
42	ct	2014-3-27	2022-03-01	2022-03-01	95	0	95	0	46	male	yes	no	poor	BII	IIIA	N0	27	32	0.06	2+
43	ct	2014-3-24	2017-10-03	2016-10-01	42	1	30	1	45	male	no	no	poor	BII	IIA	N1	1	26	0.04	1+
44	ct	2014-2-27	2017-09-01	2016-09-01	42	1	30	1	63	male	yes	no	poor	BII	IIIB	N3	10	39	0.26	0
45	ct	2014-11-14	2022-03-01	2022-03-01	87	0	87	0	46	male	yes	no	poor	Roux-en-Y	IIIA	N2	4	33	0.12	2+
46	ct	2014-6-16	2017-06-01	2017-04-16	35	1	34	1	61	male	no	no	poor	Roux-en-Y	IIIB	N3	10	32	0.31	0
47	ct	2014-10-27	2015-09-17	2015-06-01	10	1	7	1	44	male	no	no	poor	BII	IIIB	N1	1	19	0.05	1+
48	ct	2014-9-9	2016-09-20	2015-09-23	24	1	12	1	49	male	no	no	poor	Roux-en-Y	IIIB	N2	3	12	0.25	0
49	ct	2014-5-14	2017-06-01	2017-02-16	36	1	33	1	67	male	yes	yes	poor	BII	IIIB	N1	2	10	0.2	0
50	ct	2014-9-1	2017-04-01	2017-03-28	31	1	30	1	57	female	no	no	poor	Roux-en-Y	IIIB	N3	9	9	1	3+
51	ct	2014-7-10	2022-03-01	2022-03-01	91	0	91	0	53	female	no	no	poor	Roux-en-Y	IIIA	N2	3	21	0.14	1+
52	ct	2014-1-24	2017-11-17	2015-07-15	45	1	17	1	44	male	yes	no	poor	BII	IIA	N0	0	42	0	1+
53	ct	2013-12-12	2017-01-01	2016-09-23	36	1	33	1	43	female	no	no	well	BII	IIA	N2	6	12	0.5	0
54	ct	2014-1-15	2015-10-01	2014-10-18	20	1	9	1	65	male	no	no	poor	BII	IIIB	N3	12	27	0.44	2+
55	ct	2014-3-31	2016-03-12	2015/11/3	23	1	19	1	55	female	no	no	poor	BII	IIIC	N3	9	21	0.43	1+
56	ct	2014-9-10	2017-05-01	2017-05-01	31	1	31	1	76	female	no	no	poor	BII	IIIA	N3	11	15	0.73	0
57	ct	2014-10-20	2016-07-19	2015/2/3	20	1	3	1	65	female	no	no	poor	BII	IIIB	N3	8	20	0.4	0
58	ct	2015-04-06	2022-03-01	2022-03-01	82	0	82	0	59	female	no	no	poor	Roux-en-Y	IIIA	N3	9	11	0.82	0
59	ct	2015-5-28	2020-06-01	2016-01-07	60	1	7	1	53	female	no	no	poor	BII	IIIA	N0	0	4	0	0
60	ct	2015-02-06	2017-10-03	2016-11-23	31	1	21	1	41	female	no	no	poor	Roux-en-Y	IIIB	N3	10	11	0.91	0
61	ct	2015-12-29	2019-02-03	2018-07-11	37	1	30	1	52	male	no	no	poor	BII	IIIB	N3	13	16	0.81	0
62	ct	2015-8-24	2022-03-01	2022-03-01	78	0	78	0	21	male	no	no	poor	Roux-en-Y	IIIB	N2	4	19	0.21	0
63	ct	2015-6-22	2022-03-01	2022-03-01	80	0	80	0	47	male	no	no	poor	BII	IIIA	N0	0	6	0	0
64	ct	2015-9-1	2020-08-01	2019-10-01	59	1	49	1	57	male	no	no	poor	BII	IIIA	N2	4	4	1	1+
65	ct	2015-05-14	2022-03-01	2022-03-01	81	0	81	0	47	male	no	no	medium	BI	IIIA	N2	3	69	0.04	1+
66	ct	2015-11-5	2022-03-01	2022-03-01	75	0	75	0	63	female	no	no	poor	BII	IIIA	N2	4	11	0.36	0
67	ct	2015-9-24	2022-03-01	2022-03-01	77	0	77	0	68	male	yes	yes	poor	BI	IIIA	N2	3	37	0.08	0
68	ct	2015-10-6	2016-06-01	2016-06-01	7	1	7	1	53	male	yes	no	medium	Roux-en-Y	IIIA	N1	1	55	0.02	1+
69	ct	2015-06-04	2016-04-01	2016-04-01	9	1	9	1	55	male	yes	no	poor	Roux-en-Y	IIB	N1	1	33	0.03	2+
70	ct	2015-9-29	2017-05-04	2016-11-21	19	1	13	1	50	female	no	no	poor	Roux-en-Y	IIB	N0	0	23	0	0
71	ct	2015-12-14	2022-03-01	2021-03-01	74	0	62	1	57	male	yes	yes	poor	BI	IIB	N1	2	15	0.13	0
72	ct	2015-9-10	2019-02-23	2018-07-12	41	1	34	1	60	male	no	yes	poor	BII	IIIB	N3	13	15	0.87	0
73	ct	2015-10-7	2018-10-12	2017-11-01	36	1	24	1	52	male	no	no	poor	Roux-en-Y	IIA	N0	0	8	0	0
74	ct	2015-01-06	2018-09-20	2018-09-20	44	1	44	1	52	male	yes	no	poor	BII	IIIA	N0	3	22	0.14	0
75	ct	2015-12-2	2021-03-01	2018-04-18	62	1	28	1	50	female	no	no	poor	BII	IIA	N0	0	25	0	0
76	ct	2015-03-24	2022-03-01	2022-03-01	83	0	83	0	46	male	no	no	poor	Roux-en-Y	IIIA	N0	0	8	0	0
77	ct	2015-7-7	2016-03-01	2015-12-03	7	1	4	1	59	male	yes	no	poor	Roux-en-Y	IIIC	N3	10	19	0.53	3+
78	ct	2015-06-22	2022-03-01	2022-03-01	80	0	80	0	45	male	no	no	poor	Roux-en-Y	IIIC	N3	8	10	0.8	0
79	ct	2015/5/7	2017-05-13	2016-07-01	24	1	13	1	60	male	no	yes	poor	BII	IIIB	N2	7	21	0.33	1+
80	ct	2015-11-11	2022-03-01	2022-03-01	75	0	75	0	56	male	yes	yes	well	BI	IIIC	N3	17	21	0.81	2+
81	ct	2015-05-12	2017-06-15	2016-01-01	25	1	7	1	72	male	no	no	poor	BI	IIIB	N3	6	14	0.43	0
82	ct	2015-03-03	2017-02-06	2016-09-01	23	1	17	1	56	male	yes	yes	poor	Roux-en-Y	IIIB	N2	5	31	0.16	0
83	ct	2015-10-14	2020-08-26	2020-03-01	58	1	52	1	60	male	no	yes	poor	Roux-en-Y	IIIC	N3	12	27	0.44	1+
84	ct	2015-11-18	2016-12-15	2016-09-14	12	1	9	1	51	male	no	no	poor	BI	IIIB	N3	7	60	0.12	0
85	ct	2015-7-23	2016-08-30	2016-03-03	13	1	7	1	48	female	no	no	poor	BI	IIB	N1	3	23	0.13	0
86	ct	2015-01-16	2022-03-01	2022-03-01	85	0	85	0	59	male	yes	no	poor	BII	IIB	N1	1	31	0.03	3+
87	ct	2015-12-10	2017-02-01	2016-05-27	13	1	5	1	62	male	yes	no	poor	BI	IIIC	N3	17	22	0.77	1+
88	ct	2016-10-24	2018-05-17	2018-02-01	18	1	15	1	50	female	no	no	poor	BII	IIB	N0	3	16	0.19	0
89	ct	2016-12-16	2021-06-01	2020-04-01	53	1	39	1	64	female	no	no	poor	Roux-en-Y	IIB	N0	0	13	0	3+
90	ct	2016-11-10	2018-02-25	2017-12-14	15	1	13	1	48	male	no	no	poor	BII	IIA	N0	0	13	0	0
91	ct	2016-11-7	2020-04-13	2019-04-25	41	1	29	1	58	male	no	no	poor	Roux-en-Y	IIIB	N2	4	23	0.17	2+
92	ct	2016-11-4	2019-11-01	2018-08-01	35	1	20	1	51	male	yes	yes	poor	BI	IIB	N2	4	47	0.09	0
93	ct	2016-7-20	2018-07-01	2018-01-12	23	1	17	1	54	male	no	no	poor	BII	IIIB	N1	1	33	0.03	2+
94	ct	2016-5-12	2021-07-01	2021-02-01	61	1	56	1	51	female	no	no	poor	BII	IIA	N0	0	16	0	1+
95	ct	2016-12-14	2021-08-01	2018-03-01	55	1	14	1	45	female	no	no	poor	BII	IIIA	N2	4	13	0.31	1+
96	ct	2016-3-30	2020-05-01	2018-06-14	49	1	26	1	47	male	yes	yes	well	BI	IIIB	N3	9	9	1	1+
97	ct	2016-7-26	2018-08-17	2018-04-09	24	1	20	1	54	male	no	no	poor	BII	IIIC	N3	18	32	0.56	0
98	ct	2016-7-28	2018-05-23	2018-01-01	21	1	17	1	59	male	yes	yes	poor	BII	IIIC	N3	11	12	0.92	0
99	ct	2016-11-23	2019-10-01	2018-12-01	34	1	24	1	49	male	yes	yes	medium	BI	IIIC	N3	12	22	0.55	0
100	ct	2016-3-28	2022-03-01	2022-03-01	71	0	71	0	42	female	no	no	poor	BII	IIA	N0	0	15	0	0
101	ct	2016-7-25	2018-12-01	2018-08-21	28	1	24	1	52	male	no	no	poor	BII	IIA	N0	2	44	0.05	0
102	ct	2016-8-4	2017-12-01	2017-03-02	15	1	6	1	63	male	no	no	poor	BII	IIIB	N3	10	25	0.4	1+
103	ct	2016-10-25	2022-03-01	2022-03-01	64	0	64	0	47	male	no	no	medium	BII	IIB	N1	0	26	0	0
104	ct	2016-7-7	2018-05-13	2018-02-27	22	1	19	1	43	male	yes	yes	poor	BII	IIIB	N3	10	13	0.77	0
105	ct	2016-9-30	2019-10-31	2019-10-31	37	0	37	0	52	male	yes	yes	poor	BII	IIIA	N3	10	15	0.67	4
106	ct	2016-4-20	2022-03-01	2017-03-29	70	0	11	1	64	male	yes	yes	poor	BII	IIIA	N2	4	9	0.44	0
107	ct	2016-5-31	2018-07-16	2018-03-28	25	1	21	1	45	male	no	no	poor	BI	IIIA	N0	0	11	0	3+
108	ct	2016-4-12	2018-07-01	2018-07-01	26	1	26	1	37	female	no	no	poor	BII	IIIA	N0	0	25	0	0
109	ct	2016-11-8	2019-05-16	2019-03-04	30	1	27	1	54	male	yes	yes	poor	Roux-en-Y	IIIC	N3	11	21	0.52	0
110	ct	2016-1-5	2022-03-01	2022-03-01	73	0	73	0	43	male	yes	yes	poor	BII	IIIB	N3	7	12	0.58	0
111	ct	2016-12-8	2017-10-03	2017-07-07	9	1	6	1	60	male	yes	no	poor	BI	IIIC	N3	18	24	0.75	0
112	ct	2014-08-12	2017-08-01	2016-05-05	35	1	20	1	51	male	no	no	poor	BII	IIIA	N0	3	8	0.38	3+
113	ct	2016-4-18	2018-07-01	2017-12-18	26	1	20	1	48	female	no	no	poor	BII	IIIC	N3	13	25	0.52	0
114	ct	2016-8-31	2022-03-01	2022-03-01	66	0	66	0	50	male	yes	yes	poor	Roux-en-Y	IIIA	N2	4	18	0.22	1+
115	ct	2016-4-29	2022-03-01	2022-03-01	70	0	70	0	63	male	no	no	poor	BII	IIA	N0	0	13	0	0
116	ct	2016-3-7	2017-04-16	2016-12-01	13	1	8	1	67	male	no	no	poor	BII	IIIC	N3	14	20	0.7	0
117	ct	2016-10-21	2021-03-01	2019-08-01	52	1	33	1	59	male	no	no	poor	Roux-en-Y	IIIC	N3	18	23	0.78	0
118	ct	2016-11-30	2018-07-01	2018-02-28	19	1	14	1	60	female	no	no	poor	BII	IIIC	N3	10	19	0.53	0
119	ct	2016-11-24	2017-12-15	2017-03-28	12	1	4	1	59	female	yes	no	poor	BII	IIIB	N3	9	9	1	3+
120	ct	2016-9-8	2018-05-11	2017-12-15	20	1	15	1	48	male	yes	yes	poor	BII	IIIB	N1	2	15	0.13	0
121	ct	2016-2-24	2019-02-01	2017-11-27	35	1	21	1	37	male	yes	no	poor	Roux-en-Y	IIIB	N3	9	11	0.82	0
122	ct	2016-6-20	2022-03-01	2022-03-01	68	0	68	0	51	male	no	yes	well	BII	IIIA	N0	0	31	0	0
123	ct	2016-11-3	2022-03-01	2022-03-01	63	0	63	0	47	male	no	no	poor	BII	IIIA	N2	4	29	0.14	2+
124	ct	2016-1-18	2016-11-15	2016-06-20	9	1	5	1	40	female	no	no	poor	Roux-en-Y	IIIC	N3	8	21	0.38	0
125	ct	2016-7-11	2017-12-03	2017-12-03	16	1	16	1	50	male	yes	yes	poor	BII	IIIC	N3	17	29	0.59	0
126	ct	2016-5-18	2018-02-01	2017-11-24	20	1	18	1	63	male	no	no	poor	BII	IIIC	N3	16	31	0.52	0
127	ct	2017-1-16	2018-10-01	2017-09-20	20	1	8	1	70	male	yes	no	poor	Roux-en-Y	IIIB	N2	5	12	0.42	0
128	ct	2017-5-24	2020-02-01	2019-03-29	32	1	22	1	55	male	no	no	poor	Roux-en-Y	IIIA	N2	3	26	0.12	3+
129	ct	2017-9-6	2022-03-01	2022-03-01	53	0	53	0	54	male	no	no	poor	BII	IIIB	N1	1	4	0.25	0
130	ct	2017-9-14	2021-08-11	2021-01-05	46	1	39	1	53	male	yes	yes	poor	BII	IIIC	N3	18	23	0.78	1+
131	ct	2017-12-5	2019-03-27	2018-11-04	15	1	10	1	50	male	no	no	poor	BII	IIIB	N3	15	39	0.38	0
132	ct	2017-4-17	2021-10-01	2020-08-01	53	1	39	1	66	male	yes	no	poor	BII	IIA	N1	1	41	0.02	1+
133	ct	2017-4-7	2018-12-15	2018-07-23	20	1	15	1	54	female	no	no	poor	BI	IIIB	N3	13	15	0.87	1+
134	ct	2017-9-21	2022-03-01	2022-03-01	53	0	53	0	51	male	no	no	medium	BII	IIIB	N3	7	19	0.37	0
135	ct	2017-5-31	2022-03-01	2022-03-01	57	0	57	0	62	male	yes	yes	poor	BII	IIIB	N3	10	33	0.3	0
136	ct	2017-8-14	2019-05-01	2019-01-04	20	1	16	1	47	male	no	no	poor	BII	IIA	N0	0	10	0	1+
137	ct	2017-9-20	2022-03-01	2022-03-01	53	0	53	0	55	female	no	no	poor	BII	IIIA	N1	2	19	0.11	0
138	ct	2017-10-19	2019-01-22	2018-10-25	15	1	12	1	53	female	no	no	well	BII	IIA	N0	0	13	0	1+
139	ct	2017-3-23	2020-07-01	2020-07-01	39	1	39	1	60	male	no	yes	poor	BI	IIIA	N2	4	31	0.13	0
140	ct	2017-2-8	2022-03-01	2022-03-01	60	0	60	0	43	female	no	no	poor	BII	IIIA	N2	3	13	0.23	1+
141	ct	2017-3-3	2022-03-01	2022-03-01	59	0	59	0	48	male	no	no	poor	Roux-en-Y	IIIB	N1	1	33	0.03	0
142	ct	2017-3-9	2022-03-01	2022-03-01	59	0	59	0	57	male	yes	no	poor	BII	IIIB	N1	1	20	0.05	1+
143	ct	2017-10-10	2022-03-01	2022-03-01	52	0	52	0	45	male	yes	no	poor	BII	IIA	N0	0	21	0	2+
144	ct	2017-1-18	2022-03-01	2022-03-01	61	0	61	0	62	female	no	yes	poor	Roux-en-Y	IIIB	N2	3	15	0.2	0
145	ct	2017-7-7	2022-03-01	2022-03-01	55	0	55	0	45	female	no	no	poor	Roux-en-Y	IIIB	N2	6	25	0.24	0
146	ct	2017-3-28	2022-03-01	2022-03-01	59	0	59	0	59	female	no	no	poor	BI	IIIB	N3	9	22	0.41	1+
147	ct	2017-11-16	2018-10-22	2018-03-01	11	1	3	1	60	male	no	no	poor	BII	IIIB	N3	7	15	0.47	0
148	ct	2017-2-16	2022-03-01	2022-03-01	60	0	60	0	65	male	no	no	poor	Roux-en-Y	IIIA	N0	0	16	0	1+
149	ct	2017-1-9	2022-03-01	2022-03-01	61	0	61	0	53	male	yes	yes	poor	BII	IIIC	N3	8	40	0.2	1+
150	ct	2017-4-26	2020-10-01	2019-12-01	41	1	31	1	52	male	no	no	poor	BI	IIIA	N2	4	21	0.19	2+
151	ct	2017-3-13	2017-07-30	2017-07-30	4	0	4	0	53	male	yes	no	poor	BI	IIIA	N2	6	23	0.26	0
152	ct	2017-9-25	2020-06-01	2020-06-01	32	1	32	1	63	male	yes	no	poor	Roux-en-Y	IIIB	N3	10	30	0.33	0
153	ct	2017-5-8	2022-03-01	2022-03-01	57	0	57	0	41	female	no	no	poor	BII	IIB	N0	0	34	0	0
154	ct	2014-11-24	2022-03-01	2022-03-01	87	0	87	0	70	male	no	no	poor	BII	IIIA	N0	0	9	0	1+
155	ct	2017-8-10	2022-03-01	2022-03-01	54	0	54	0	65	male	yes	yes	poor	BII	IIIC	N3	12	28	0.43	0
156	ct	2017-9-12	2022-03-01	2022-03-01	53	0	53	0	52	male	yes	no	poor	BI	IIA	N1	2	21	0.1	0
157	ct	2017-6-30	2022-03-01	2022-03-01	56	0	56	0	66	male	yes	no	poor	Roux-en-Y	IIIB	N2	3	18	0.17	1+
158	ct	2017-11-13	2019-05-07	2018/12/11	17	1	12	1	73	male	yes	no	poor	BI	IIIB	N3	13	28	0.46	0
159	ct	2017-8-10	2019-08-01	2018-04-11	23	1	8	1	32	female	no	no	poor	Roux-en-Y	IIIB	N3	7	12	0.58	0
160	ct	2017-2-10	2019-10-31	2019-10-31	32	0	32	0	56	male	no	no	poor	BII	IIIB	N3	12	47	0.26	0
161	ct	2017-1-2	2018-05-17	2017-12-11	16	1	11	1	61	male	yes	yes	poor	BII	IIIC	N3	10	19	0.53	0
162	ct	2017-11-30	2018-12-20	2018-09-21	12	1	9	1	53	female	no	no	poor	Roux-en-Y	IIA	N3	3	12	0.25	0
163	crt	2013-12-16	2016-03-15	2015-06-15	26	0	17	1	61	male	yes	no	poor	BI	IIB	N2	3	13	0.23	1+
164	crt	2013-11-26	2016-03-15	2016-03-15	27	0	27	0	45	male	yes	yes	poor	BII	IIB	N1	2	5	0.4	0
165	crt	2013-10-17	2016-03-15	2016-03-15	28	0	28	0	56	male	yes	yes	poor	BII	IIB	N1	1	35	0.03	0
166	crt	2013-08-29	2016-03-15	2016-03-15	30	0	30	0	56	male	no	no	poor	BII	IIIA	N3	10	23	0.43	1+
167	crt	2013-07-23	2016-03-15	2016-03-15	31	0	31	0	57	female	no	no	well	BII	IIIB	N3	11	39	0.28	1+
168	crt	2013-07-02	2016-03-15	2016-03-15	32	0	32	0	56	female	no	no	poor	BII	IIIB	N3	7	11	0.64	1+
169	crt	2013-11-26	2016-03-15	2016-03-15	27	0	27	0	52	male	yes	no	poor	BII	IIIA	N2	3	12	0.25	1+
170	crt	2013-10-17	2022-03-01	2022-03-01	100	0	100	0	48	female	no	no	poor	Roux-en-Y	IIIB	N3	8	12	0.67	1+
171	crt	2013-12-16	2022-03-01	2022-03-01	98	0	98	0	43	male	no	no	poor	BI	IIA	N0	0	14	0	0
172	crt	2013-12-11	2022-03-01	2017-10-15	98	0	46	1	41	male	no	no	poor	BII	IIB	N0	0	24	0	0
173	crt	2013-07-15	2022-03-01	2022-03-01	103	0	103	0	48	female	no	no	poor	BII	IIA	N0	0	12	0	1+
174	crt	2013-05-27	2022-03-01	2022-03-01	105	0	105	0	58	male	yes	yes	poor	BI	IIIB	N3	15	37	0.41	1+
175	crt	2013-05-09	2021-10-01	2021-10-01	100	1	100	1	55	male	no	no	poor	BII	IIIB	N1	2	16	0.13	2+
176	crt	2013-04-12	2022-03-01	2022-03-01	106	0	106	0	39	female	no	no	poor	Roux-en-Y	IIB	N2	3	12	0.25	1+
177	crt	2013-05-08	2022-03-01	2022-03-01	105	0	105	0	51	male	yes	no	poor	BII	IIIC	N3	21	24	0.88	0
178	crt	2013-10-21	2014-08-18	2014-03-14	9	1	4	1	65	male	no	no	poor	BII	IIIB	N3	10	31	0.32	1+
179	crt	2013-08-20	2014-12-02	2014-12-02	15	1	15	1	69	male	yes	yes	medium	BII	IIIA	N0	0	9	0	2+
180	crt	2013-08-01	2014-08-15	2014-08-15	12	1	12	1	57	male	yes	no	poor	Roux-en-Y	IIIC	N3	17	27	0.63	0
181	crt	2013-08-07	2016-09-15	2014-07-08	37	1	11	1	53	male	no	no	poor	Roux-en-Y	IIIB	N3	13	15	0.87	1+
182	crt	2013-07-18	2015-06-15	2014-03-09	22	1	7	1	47	female	no	no	poor	BII	IIIB	N3	10	11	0.91	1+
183	crt	2013-01-10	2018-02-01	2017-06-15	60	1	53	1	69	female	no	no	poor	BII	IIIB	N3	10	25	0.4	0
184	crt	2012-10-15	2017-09-15	2016-06-15	59	1	44	1	62	male	yes	yes	poor	BII	IIIA	N2	5	14	0.36	2+
185	crt	2013-03-28	2015-01-15	2015-01-15	21	1	21	1	72	female	no	no	poor	BII	IIA	N0	0	42	0	1+
186	crt	2013-05-02	2016-05-03	2014-04-04	36	1	11	1	61	male	no	yes	poor	BI	IIB	N1	2	2	1	1+
187	crt	2013-07-12	2016-11-01	2015-08-13	39	1	25	1	46	male	no	yes	poor	BII	IIIB	N3	7	15	0.47	1+
188	crt	2013-11-19	2022-03-01	2022-03-01	99	0	99	0	55	male	yes	no	poor	BII	IIIA	N2	5	10	0.5	0
189	crt	2014-03-21	2022-03-01	2022-03-01	95	0	95	0	54	male	yes	yes	poor	BII	IIIA	N2	3	10	0.3	2+
190	crt	2014-04-07	2022-03-01	2022-03-01	94	0	94	0	25	male	no	no	well	BI	IIA	N2	6	39	0.15	2+
191	crt	2014-05-13	2022-03-01	2022-03-01	93	0	93	0	59	male	yes	yes	poor	BII	IIB	N1	1	28	0.04	2+
192	crt	2014-03-11	2020-12-01	2020-12-01	80	1	80	1	50	male	no	no	poor	BII	IIIC	N3	9	18	0.5	4
193	crt	2014-04-07	2022-03-01	2022-03-01	94	0	94	0	32	male	no	no	poor	BII	IIIA	N3	11	37	0.3	0
194	crt	2014-07-17	2022-03-01	2022-03-01	91	0	91	0	61	male	yes	no	poor	BII	IIA	N1	2	22	0.09	0
195	crt	2014-05-14	2022-03-01	2022-03-01	93	0	93	0	50	male	no	no	poor	BII	IIB	N1	1	14	0.07	4
196	crt	2014-09-01	2021-02-01	2018-07-31	77	1	46	1	61	female	no	no	poor	BI	IIA	N0	0	19	0	0
197	crt	2014-09-30	2019-08-01	2018-12-13	58	1	50	1	35	male	no	no	medium	BII	IIA	N0	14	24	0.58	0
198	crt	2015-05-14	2022-03-01	2022-03-01	81	0	81	0	60	male	yes		poor	Roux-en-Y	IIIA	N2	4	20	0.2	4
199	crt	2014-05-09	2022-03-01	2022-03-01	93	0	93	0	51	male	no	no	poor	Roux-en-Y	IIIA	N3	8	19	0.42	0
200	crt	2014-07-21	2022-03-01	2022-03-01	91	0	91	0	49	male	no	no	poor	Roux-en-Y	IIIB	N3	9	16	0.56	1+
201	crt	2014-06-09	2020-10-01	2018-11-14	75	1	53	1	58	male	no	no	poor	BII	IIIC	N3	19	24	0.79	0
202	crt	2014-04-10	2016-03-15	2016-03-15	23	0	23	0	39	female	no	no	poor	BII	IIB	N1	1	39	0.03	2+
203	crt	2014-04-16	2015-04-01	2014-12-15	11	1	7	1	36	male	no	no	medium	BII	IIIB	N3	16	32	0.5	1+
204	crt	2014-05-04	2016-03-15	2016-03-15	22	0	22	0	51	female	no	no	well	BII	IIIA	N2	4	14	0.29	0
205	crt	2014-06-23	2016-03-15	2016-03-15	20	0	20	0	56	male	yes	yes	poor	BI	IIA	N2	3	19	0.16	3+
206	crt	2014-03-01	2016-03-15	2016-03-15	24	0	24	0	43	male	no	no	poor	BII	IIA	N0	0	5	0	0
207	crt	2014-03-05	2016-02-26	2015-04-22	23	1	13	1	52	male	yes	yes	poor	BII	IIIA	N3	7	15	0.47	1+
208	crt	2014-01-21	2017-02-15	2015-08-09	36	1	18	1	57	male	yes	yes	well	BII	IIA	N0	0	22	0	4
209	crt	2014-06-11	2017-11-01	2016-05-01	40	1	22	1	59	male	yes	no	medium	BI	IIIB	N3	9	28	0.32	0
210	crt	2014-07-01	2017-02-15	2017-02-15	31	1	31	1	49	male	no	no	poor	BI	IIIA	N2	3	24	0.13	0
211	crt	2014-07-24	2015-06-15	2015-06-15	10	1	10	1	60	male	no	no	poor	BI	IIIB	N3	9	25	0.36	1+
212	crt	2013-09-13	2016-07-05	2015-08-24	33	1	23	1	41	female	no	no	well	BII	IIIB	N2	6	22	0.27	0
213	crt	2014-05-21	2015-06-23	2015-01-15	13	1	7	1	29	male	no	no	poor	BII	IIIB	N2	5	23	0.22	0
214	crt	2013-11-14	2014-10-15	2014-10-15	11	1	11	1	70	male	yes	no	poor	Roux-en-Y	IIIB	N3	12	13	0.92	4
215	crt	2014-06-30	2015-09-01	2015-02-08	14	1	7	1	50	male	yes	no	poor	Roux-en-Y	IIIB	N3	8	8	1	0
216	crt	2014-05-07	2015-07-16	2015-07-16	14	1	14	1	46	male	no	no	poor	Roux-en-Y	IIA	N0	0	12	0	4
217	crt	2013-12-09	2017-08-20	2017-08-20	44	1	44	1	46	male	no	yes	poor	BII	IIA	N0	0	18	0	1+
218	crt	2013-10-10	2017-11-28	2017-11-28	49	1	49	1	62	male	yes	no	poor	Roux-en-Y	IIIB	N2	3	8	0.38	0
219	crt	2013-12-14	2015-01-15	2014-12-02	13	1	11	1	52	male	yes	yes	poor	Roux-en-Y	IIIC	N3	7	7	1	0
220	crt	2014-06-26	2017-04-01	2016-11-01	33	1	28	1	53	female	no	no	well	Roux-en-Y	IIIA	N2	3	15	0.2	2+
221	crt	2014-11-19	2016-05-14	2015-10-20	17	1	11	1	52	male	no	no	poor	BII	IIIB	N3	8	23	0.35	1+
222	crt	2015-10-20	2022-03-01	2022-03-01	76	0	76	0	59	male	yes	yes	poor	Roux-en-Y	IIIA	N0	0	15	0	3+
223	crt	2015-10-08	2022-03-01	2016-05-01	76	0	6	1	57	male	no	no	poor	BII	IIIA	N2	6	37	0.16	0
224	crt	2015-07-13	2022-03-01	2021-09-01	79	0	73	1	39	female	no	no	poor	BII	IIIC	N3	10	10	1	4
225	crt	2015-04-23	2022-03-01	2022-03-01	82	0	82	0	26	male	no	no	medium	Roux-en-Y	IIIB	N3	13	18	0.72	0
226	crt	2014-12-01	2022-03-01	2022-03-01	87	0	87	0	64	male	yes	no	poor	BI	IIA	N2	3	47	0.06	0
227	crt	2014-10-15	2022-01-01	2020-06-01	86	1	67	1	53	female	no	no	poor	Roux-en-Y	IIIA	N2	6	67	0.09	1+
228	crt	2014-09-18	2022-03-01	2022-03-01	89	0	89	0	69	male	yes	yes	poor	Roux-en-Y	IIIA	N2	6	23	0.26	0
229	crt	2015-06-03	2022-03-01	2022-03-01	80	0	80	0	54	male	yes	yes	poor	BII	IIIA	N2	5	17	0.29	1+
230	crt	2014-09-22	2022-03-01	2022-03-01	89	0	89	0	53	male	yes	yes	poor	Roux-en-Y	IIIA	N2	3	31	0.1	2+
231	crt	2015-05-25	2022-03-01	2022-03-01	81	0	81	0	58	male	no	no	poor	BI	IIIA	N2	3	17	0.18	3+
232	crt	2015-06-15	2022-03-01	2022-03-01	80	0	80	0	66	male	yes	no	medium	Roux-en-Y	IIB	N1	1	28	0.04	1+
233	crt	2015-09-22	2022-03-01	2022-03-01	77	0	77	0	53	male	yes	no	poor	BI	IIA	N0	0	18	0	0
234	crt	2015-06-08	2022-03-01	2022-03-01	80	0	80	0	42	male	no	no	poor	BII	IIIB	N3	9	35	0.26	0
235	crt	2014-8-7	2022-03-01	2022-03-01	90	0	90	0	52	female	no	no	poor	BI	IIIB	N3	11	28	0.39	0
236	crt	2015-05-14	2018-03-01	2016-03-15	33	0	10	0	51	male	no	no	medium	BI	IIA	N0	0	6	0	0
237	crt	2014-10-10	2016-10-01	2016-03-01	23	1	16	1	65	male	yes	yes	poor	Roux-en-Y	IIIB	N3	9	20	0.45	0
238	crt	2015-03-27	2018-03-01	2018-03-01	35	0	35	0	56	female	no	no	medium	BII	IIA	N0	0	13	0	0
239	crt	2014-11-11	2015-09-10	2015-09-10	9	1	9	1	62	male	yes	yes	poor	BI	IIIA	N2	5	10	0.5	0
240	crt	2014-11-24	2015-12-20	2015-12-20	12	1	12	1	68	female	no	no	poor	BII	IIIC	N3	23	37	0.62	2+
241	crt	2015-03-27	2016-03-02	2015-12-16	11	1	8	1	45	male	yes	no	poor	BII	IIIC	N3	7	16	0.44	0
242	crt	2015-03-20	2016-06-09	2016-04-08	14	1	12	1	58	female	no	yes	well	BI	IIIB	N2	4	18	0.22	4
243	crt	2014-01-19	2016-02-26	2015-08-11	25	1	18	1	50	female	no	no	poor	BII	IIIC	N3	17	32	0.53	0
244	crt	2015-07-22	2016-07-26	2016-05-31	12	1	10	1	70	male	yes	yes	poor	BII	IIIB	N3	8	24	0.33	0
245	crt	2015-01-13	2016-09-01	2016-02-16	19	1	13	1	59	male	no	no	poor	BI	IIIB	N2	5	22	0.23	0
246	crt	2015-07-23	2017-03-01	2016-08-01	19	1	12	1	52	male	no	no	poor	BII	IIIC	N3	16	25	0.64	0
247	crt	2014-12-10	2017-03-01	2016-11-01	26	1	22	1	47	male	yes	no	poor	BI	IIIB	N2	3	5	0.6	0
248	crt	2015-05-12	2017-08-11	2016-12-01	26	1	18	1	51	male	yes	no	poor	BI	IIB	N2	3	37	0.08	2+
249	crt	2014-12-24	2017-08-20	2017-08-20	31	1	31	1	25	male	no	no	medium	BII	IIA	N0	0	27	0	0
250	crt	2015-06-04	2017-11-01	2017-04-01	28	1	21	1	36	male	no	no	medium	BI	IIA	N1	1	37	0.03	3+
251	crt	2015-04-02	2018-08-20	2017-07-01	40	1	26	1	28	female	no	no	poor	Roux-en-Y	IIIC	N3	9	15	0.6	4
252	crt	2015-04-18	2018-07-13	2017-12-17	38	1	31	1	56	male	no	no	well	BII	IIIA	N2	4	16	0.25	0
253	crt	2015-06-03	2018-10-07	2018-07-03	40	1	37	1	52	male	no	no	poor	BI	IIB	N1	3	32	0.09	2+
254	crt	2015-08-13	2019-02-14	2017-03-01	42	1	18	1	69	male	no	no	poor	BII	IIB	N0	0	13	0	0
255	crt	2015-12-08	2022-03-01	2022-03-01	74	0	74	0	40	female	no	no	poor	Roux-en-Y	IIB	N2	4	7	0.57	0
256	crt	2015-09-17	2022-03-01	2022-03-01	77	0	77	0	60	female	no	no	well	BI	IIB	N1	1	29	0.03	1+
257	crt	2015-12-09	2022-03-01	2022-03-01	74	0	74	0	47	male	no	no	poor	Roux-en-Y	IIA	N2	4	10	0.4	0
258	crt	2015-08-11	2022-03-01	2022-03-01	78	0	78	0	61	male	yes	no	poor	BII	IIIB	N2	4	9	0.44	0
259	crt	2016-02-15	2021-10-08	2021-01-19	67	1	59	1	67	male	no	no	poor	Roux-en-Y	IIA	N0	0	27	0	1+
260	crt	2015-12-28	2022-03-01	2022-03-01	74	0	74	0	50	male	yes	yes	poor	BII	IIB	N2	5	26	0.19	1+
261	crt	2016-02-18	2022-03-01	2022-03-01	72	0	72	0	55	female	no	no	poor	BI	IIA	N1	2	18	0.11	0
262	crt	2016-03-07	2022-03-01	2022-03-01	71	0	71	0	30	female	no	no	poor	Roux-en-Y	IIIA	N3	7	20	0.35	4
263	crt	2016-03-31	2022-03-01	2022-03-01	71	0	71	0	52	male	yes	no	poor	BII	IIIC	N3	9	25	0.36	0
264	crt	2016-05-05	2022-03-01	2022-03-01	69	0	69	0	63	female	no	no	medium	Roux-en-Y	IIIC	N3	20	29	0.69	3+
265	crt	2016-03-23	2021-10-08	2021-02-01	66	1	58	1	58	male	yes	yes	poor	BII	IIB	N1	1	31	0.03	3+
266	crt	2016-05-26	2022-03-01	2022-03-01	69	0	69	0	44	male	yes	no	poor	Roux-en-Y	IIIA	N2	4	32	0.13	0
267	crt	2016-04-28	2022-03-01	2022-03-01	70	0	70	0	47	male	no	no	poor	Roux-en-Y	IIB	N2	3	17	0.18	1+
268	crt	2016-06-20	2022-03-01	2022-03-01	68	0	68	0	38	male	no	no	poor	BII	IIIB	N1	2	22	0.09	2+
269	crt	2016-04-26	2022-03-01	2022-03-01	70	0	70	0	47	male	yes	yes	poor	BII	IIIA	N2	4	13	0.31	0
270	crt	2016-07-04	2022-03-01	2022-03-01	67	0	67	0	35	male	no	yes	poor	Roux-en-Y	IIIC	N3	18	18	1	0
271	crt	2015-05-27	2016/9／15	2016-07-01	15	1	13	1	44	male	yes	no	poor	BII	IIIA	N3	19	26	0.73	1+
272	crt	2014-01-26	2016/2/26	2015-06-07	25	1	16	1	38	female	no	no	poor	BI	IIIA	N3	10	10	1	0
273	crt	2015-11-20	2017/8/10	2017-03-23	20	1	16	1	56	male	yes	yes	poor	Roux-en-Y	IIIC	N3	13	21	0.62	3+
274	crt	2015-12-23	2016/7/20	2016-05-11	6	1	4	1	39	male	yes	yes	poor	Roux-en-Y	IIIB	N3	7	16	0.44	1+
275	crt	2015-11-23	2017/5/11	2017-03-01	17	1	15	1	61	male	yes	yes	poor	BII	IIIC	N3	13	19	0.68	3+
276	crt	2016-01-06	2016/12/10	2016-07-01	11	1	5	1	51	male	yes	yes	poor	BI	IIIA	N3	9	42	0.21	4
277	crt	2015-12-24	2017/2／15	2016-10-01	13	1	9	1	49	female	no	no	poor	BII	IIIC	N3	24	26	0.92	1+
278	crt	2015-09-22	2017/8/10	2016-11-15	22	1	13	1	50	male	yes	yes	poor	Roux-en-Y	IIIA	N2	5	25	0.2	0
279	crt	2016-04-26	2017/10	2017-03-15	17	1	10	1	66	male	no	no	poor	BII	IIA	N2	2	20	0.1	0
280	crt	2016-01-28	2017/8/10	2017-03-17	18	1	13	1	64	male	no	no	poor	BII	IIIC	N3	14	14	1	0
281	crt	2015-12-29	2017/7/10	2017-04-01	18	1	15	1	58	male	yes	no	poor	BII	IIIC	N3	12	16	0.75	4
282	crt	2016-04-20	2017/4/20	2017-02-24	12	1	10	1	57	female	no	no	poor	BII	IIIC	N3	16	24	0.67	1+
283	crt	2015-10-27	2018/1/26	2016-03-01	26	1	4	1	61	male	yes	yes	poor	Roux-en-Y	IIIC	N3	16	16	1	0
284	crt	2015-10-07	2018/3/15	2017-09-13	29	1	23	1	50	male	yes	yes	poor	BI	IIIB	N2	5	6	0.83	1+
285	crt	2016-01-20	2018/3/17	2017-11-01	25	1	21	1	44	male	no	no	poor	BII	IIIB	N3	9	21	0.43	1+
286	crt	2015-04-05	2018/12	2018-03-04	43	1	34	1	50	female	no	no	medium	BII	IIA	N0	0	35	0	0
287	crt	2016-06-20	2018/7/16	2017-06-09	24	1	11	1	42	male	no	no	poor	BII	IIIA	N3	13	26	0.5	0
288	crt	2016-08-04	2017/11／4	2017-04-18	15	1	8	1	41	male	no	no	poor	BII	IIIA	N2	4	12	0.33	2+
289	crt	2015-7-30	2016-08-10	2016-03-01	12	1	7	1	37	female	no	no	poor	BII	IIIC	N3	13	20	0.65	0
290	crt	2015-10-21	2019-01-16	2018-01-01	38	1	26	1	53	male	no	no	poor	Roux-en-Y	IIIB	N3	11	23	0.48	3+
291	crt	2016-03-08	2018-07-24	2018-07-24	28	1	28	1	48	male	no	yes	poor	BII	IIIB	N3	15	27	0.56	1+
292	crt	2016-07-08	2018-06-26	2017-07-01	23	1	11	1	26	female	no	no	well	BII	IIIC	N3	8	50	0.16	1+
293	crt	2015-07-28	2017-03-15	2017-03-15	19	0	19	0	57	male	no	no	poor	BII	IIIC	N3	22	30	0.73	1+
294	crt	2015-12-10	2017-03-15	2017-03-15	15	0	15	0	62	male	yes	no	poor	BII	IIIC	N3	17	31	0.55	1+
295	crt	2016-12-01	2022-03-01	2022-03-01	63	0	63	0	59	male	yes	yes	well	Roux-en-Y	IIIB	N3	7	18	0.39	0
296	crt	2016-10-26	2022-03-01	2022-03-01	64	0	64	0	54	male	no	no	well	BI	IIIA	N2	4	6	0.67	4
297	crt	2016-12-21	2022-03-01	2022-03-01	62	0	62	0	52	male	no	no	medium	BII	IIIB	N1	2	6	0.33	1+
298	crt	2017-01-20	2020-08-01	2019/3/29	42	1	26	1	50	male	no	no	poor	BII	IIIC	N3	10	21	0.48	3+
299	crt	2016-10-26	2022-03-01	2022-03-01	64	0	64	0	42	male	no	no	poor	BI	IIIB	N3	9	26	0.35	0
300	crt	2016-12-05	2021-10-01	2020-12-15	57	1	48	1	74	female	no	no	poor	BI	IIA	N0	0	27	0	0
301	crt	2016-12-22	2022-03-01	2022-03-01	62	0	62	0	59	female	no	no	poor	BII	IIIB	N2	6	27	0.22	4
302	crt	2016-12-30	2019-06-01	2019-06-01	29	1	29	1	45	male	no	no	poor	Roux-en-Y	IIIB	N3	6	8	0.75	0
303	crt	2017-03-16	2022-03-01	2022-03-01	59	0	59	0	62	male	no	yes	poor	Roux-en-Y	IIIB	N3	8	20	0.4	1+
304	crt	2016-12-28	2022-03-01	2022-03-01	62	0	62	0	56	female	no	no	poor	BI	IIIA	N2	5	39	0.13	0
305	crt	2017-01-02	2020-08-01	2019-11-01	42	1	33	1	56	female	no	no	poor	BII	IIA	N2	2	35	0.06	1+
306	crt	2017-03-07	2022-03-01	2022-03-01	59	0	59	0	63	male	no	yes	poor	Roux-en-Y	IIIA	N0	0	19	0	0
307	crt	2017-03-21	2022-03-01	2022-03-01	59	0	59	0	37	female	no	no	poor	BI	IIIA	N2	6	20	0.3	0
308	crt	2017-05-04	2022-03-01	2022-03-01	57	0	57	0	30	male	no	no	poor	Roux-en-Y	IIIB	N1	2	22	0.09	0
309	crt	2017-01-13	2022-03-01	2022-03-01	61	0	61	0	61	male	no	no	poor	BII	IIIB	N3	13	26	0.5	0
310	crt	2017-04-20	2022-03-01	2022-03-01	58	0	58	0	48	male	no	yes	poor	BII	IIA	N1	2	23	0.09	2+
311	crt	2017-08-07	2022-03-01	2022-03-01	54	0	54	0	41	female	no	no	poor	BII	IIIB	N3	7	36	0.19	0
312	crt	2017-04-25	2021-01-01	2020-06-01	44	1	37	1	50	female	no	no	poor	BI	IIIB	N3	9	20	0.45	1+
313	crt	2017-07-18	2022-03-01	2022-03-01	55	0	55	0	59	male	no	no	poor	BII	IIIB	N3	10	26	0.38	0
314	crt	2017-05-17	2022-03-01	2022-03-01	57	0	57	0	73	male	no	no	poor	BI	IIIA	N2	4	19	0.21	1+
315	crt	2017-08-09	2022-03-01	2022-03-01	54	0	54	0	50	male	no	no	medium	BI	IIIA	N2	5	26	0.19	0
316	crt	2016-08-10	2022-03-01	2022-03-01	66	0	66	0	62	male	yes	yes	poor	BII	IIIB	N3	10	35	0.29	0
317	crt	2017-04-07	2020-10-01	2020-03-01	41	1	34	1	69	male	no	no	poor	BII	IIIA	N2	4	17	0.24	0
318	crt	2017-11-21	2020-12-01	2020-08-18	36	1	32	1	67	male	yes	yes	poor	Roux-en-Y	IIIC	N3	7	28	0.25	0
319	crt	2017-12-26	2020-10-01	2019-11-04	33	1	22	1	52	male	yes	no	poor	BII	IIA	N0	1	22	0.05	0
320	crt	2017-6-22	2022-03-01	2022-03-01	56	0	56	0	61	male	yes	yes	poor	BII	IIA	N1	2	39	0.05	0
321	crt	2017-6-29	2020-01-01	2018-05-28	30	1	10	1	62	male	yes	no	poor	BII	IIIB	N3	11	15	0.73	0
322	crt	2017-4-28	2022-03-01	2022-03-01	58	0	58	0	51	male	no	no	well	BII	IIIB	N2	5	17	0.29	0
323	crt	2016-06-08	2017-10-01	2017/4/18	15	1	10	1	47	female	no	no	poor	BII	IIIC	N3	16	26	0.62	0
324	crt	2017-03-01	2018-06-01	2017/11	15	1	8	1	26	female	no	no	poor	BI	IIIC	N3	8	12	0.67	3+
325	crt	2017-01-19	2018-10-01	2018/3	20	1	13	1	49	female	no	no	poor	BII	IIIA	N2	5	10	0.5	0
326	crt	2017-06-19	2018-11-26	2018/7/3	17	1	12	1	60	male	yes	no	poor	BII	IIIB	N3	7	14	0.5	0
327	crt	2017-06-22	2018/11	2018-05-14	16	1	10	1	60	male	yes	yes	well	Roux-en-Y	IIIA	N2	3	18	0.17	1+
328	crt	2017-07-31	2018-12-01	2018/5/3	16	1	9	1	52	male	no	no	medium	BII	IIIC	N3	19	31	0.61	1+
